# Supplementary material for: Clinical Significance of Systemic Inflammation Markers in Newly Diagnosed, Previously Untreated Hepatocellular Carcinoma
Source: MDPI journal article supplement (doi:10.3390/cancers12051300), 2020-05-21
Supplement: s1 [file s1]

# Supplementary Materials: Clinical Significance of Systemic Inflammation Markers in Newly Diagnosed, Previously Untreated Hepatocellular Carcinoma

Jeong Il Yu, Hee Chul Park, Gyu Sang Yoo, Seung Woon Paik, Moon Suk Choi, Hye-Seung Kim, Insuk Sohn and Heerim Nam

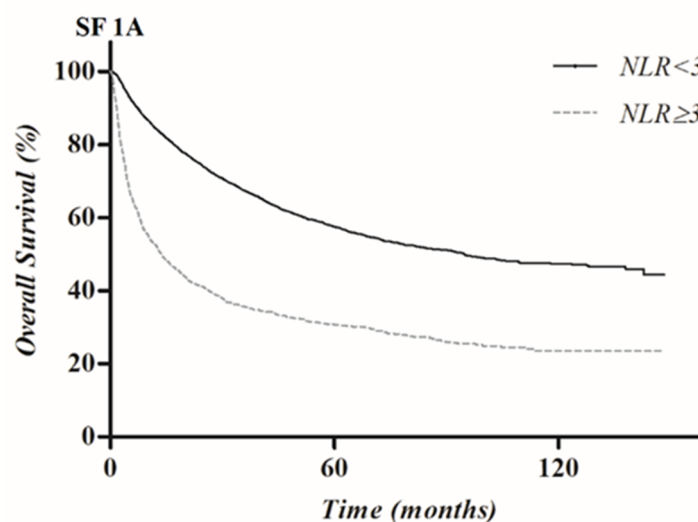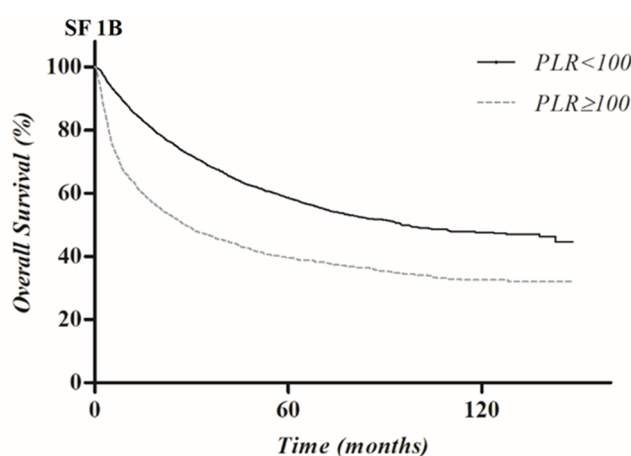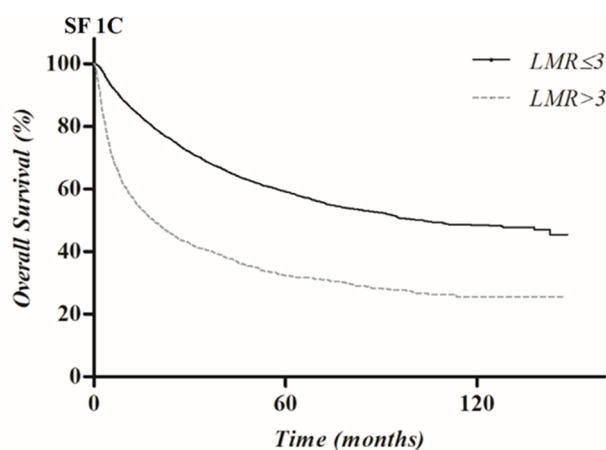

**Figure S1.** Kaplan-Meier curves of OS according to the systemic inflammation markers (SIMs) as categorical variables in the training set: The survival curves showed clear differences according to the neutrophil to lymphocyte ratio ( $NLR \geq 3$ , SF 1A), platelet to lymphocyte ratio ( $PLR \geq 100$ , SF 1B), and lymphocyte to monocyte ratio ( $LMR \leq 3$ , SF 1C).

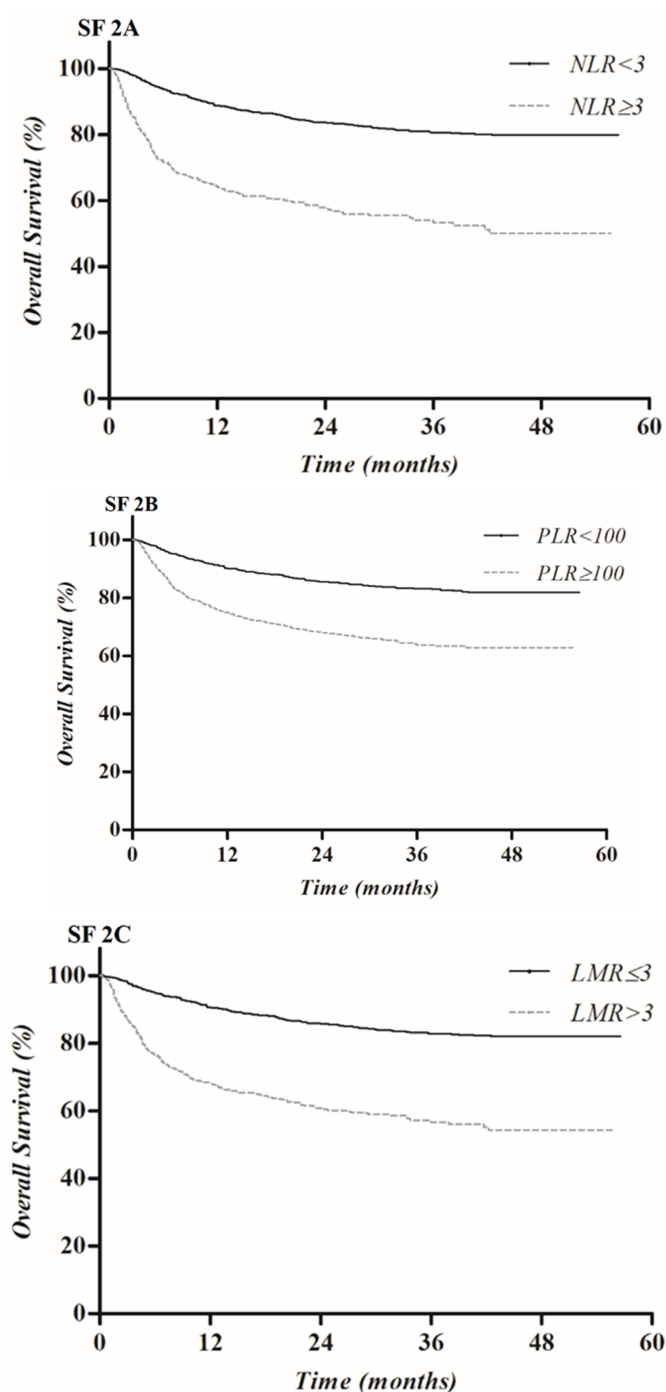

**Figure S2.** Kaplan-Meier curves of OS according to the SIMs as categorical variables in the validation set: The survival curves showed clear differences according to the NLR (S1A), PLR (S1B), and LMR (S1C).

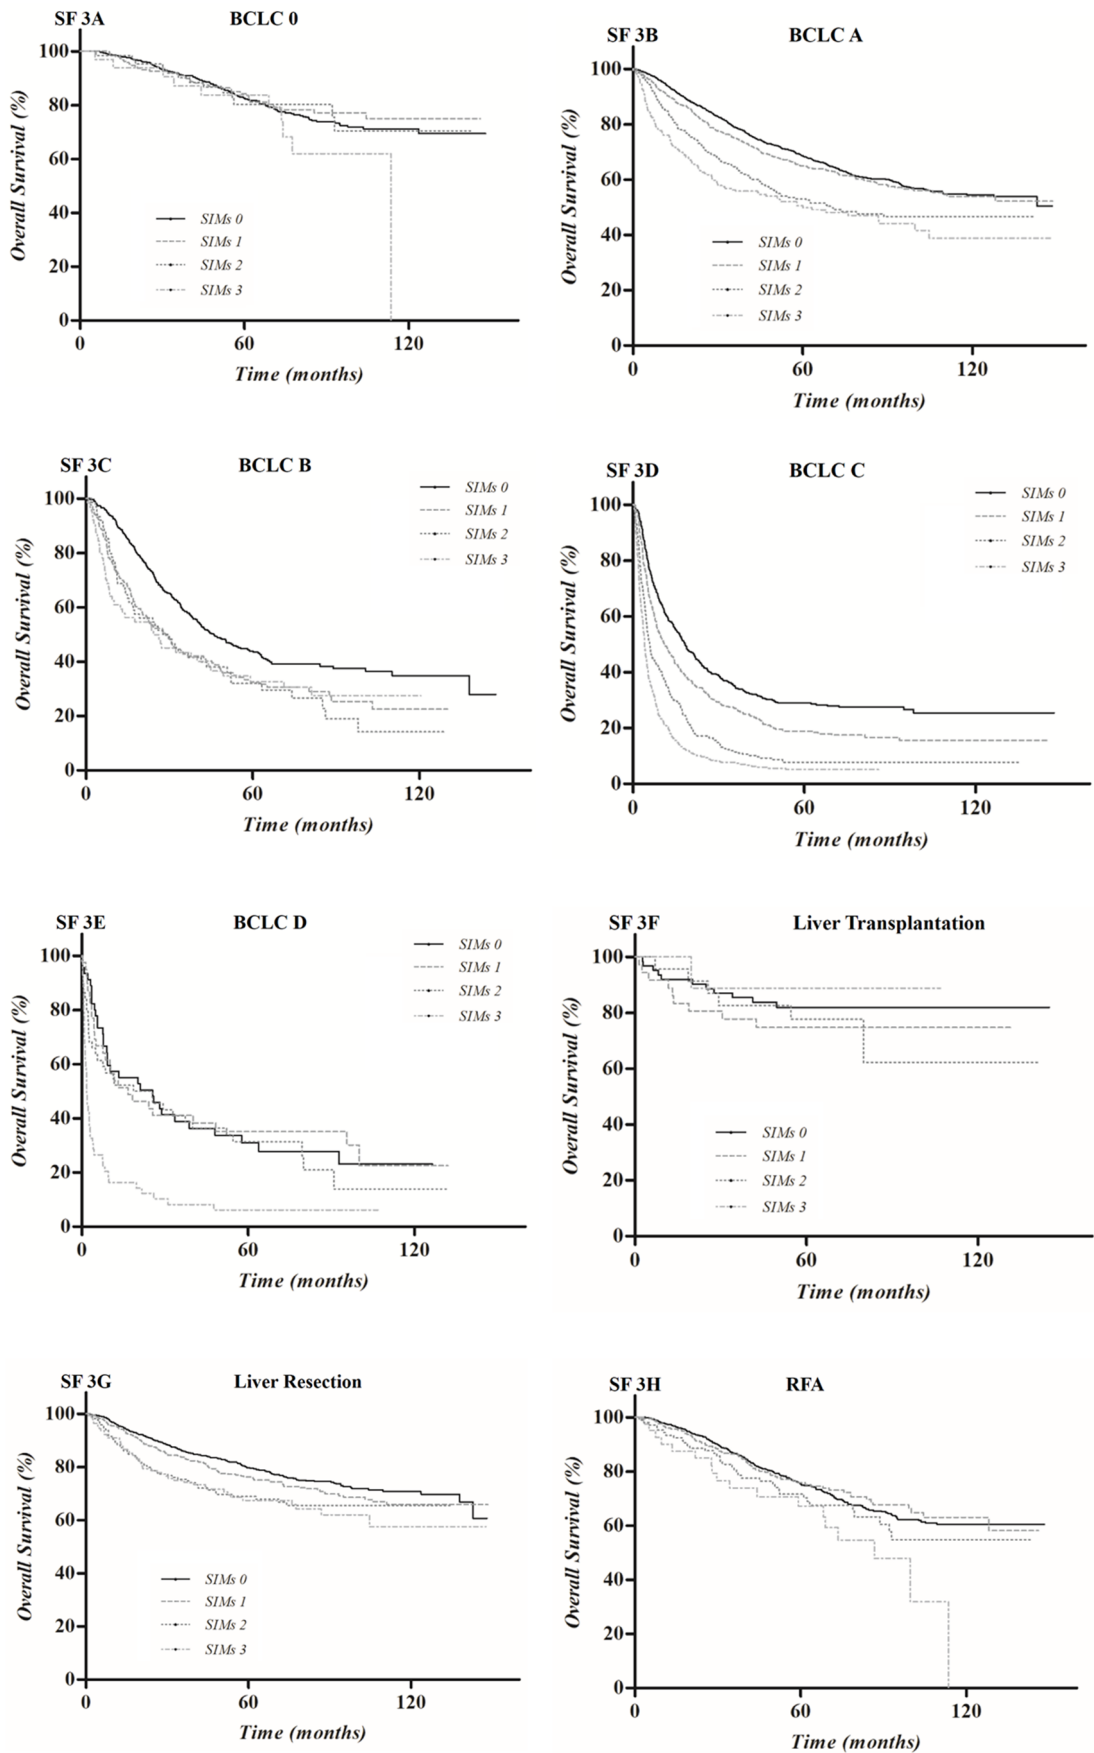

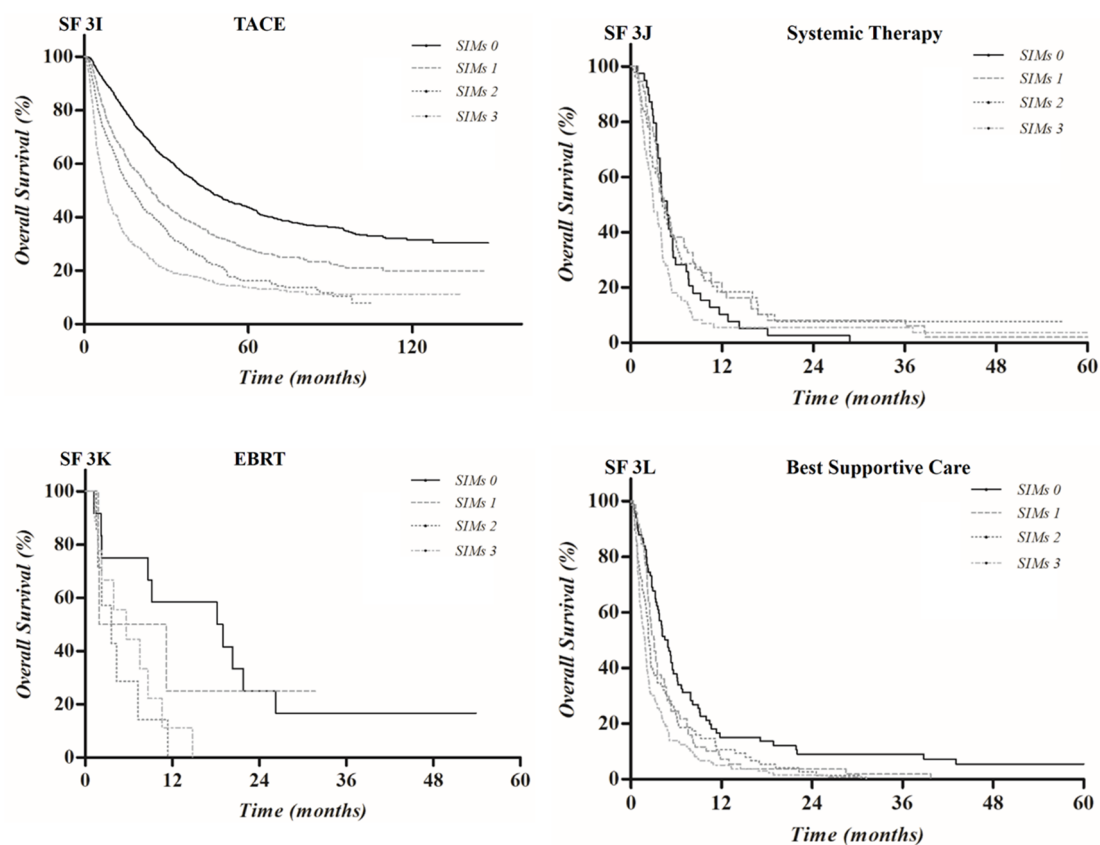

**Figure S3.** Kaplan-Meier curves of OS according to the SIMs and BCLC staging systems or treatment modalities in the training set.

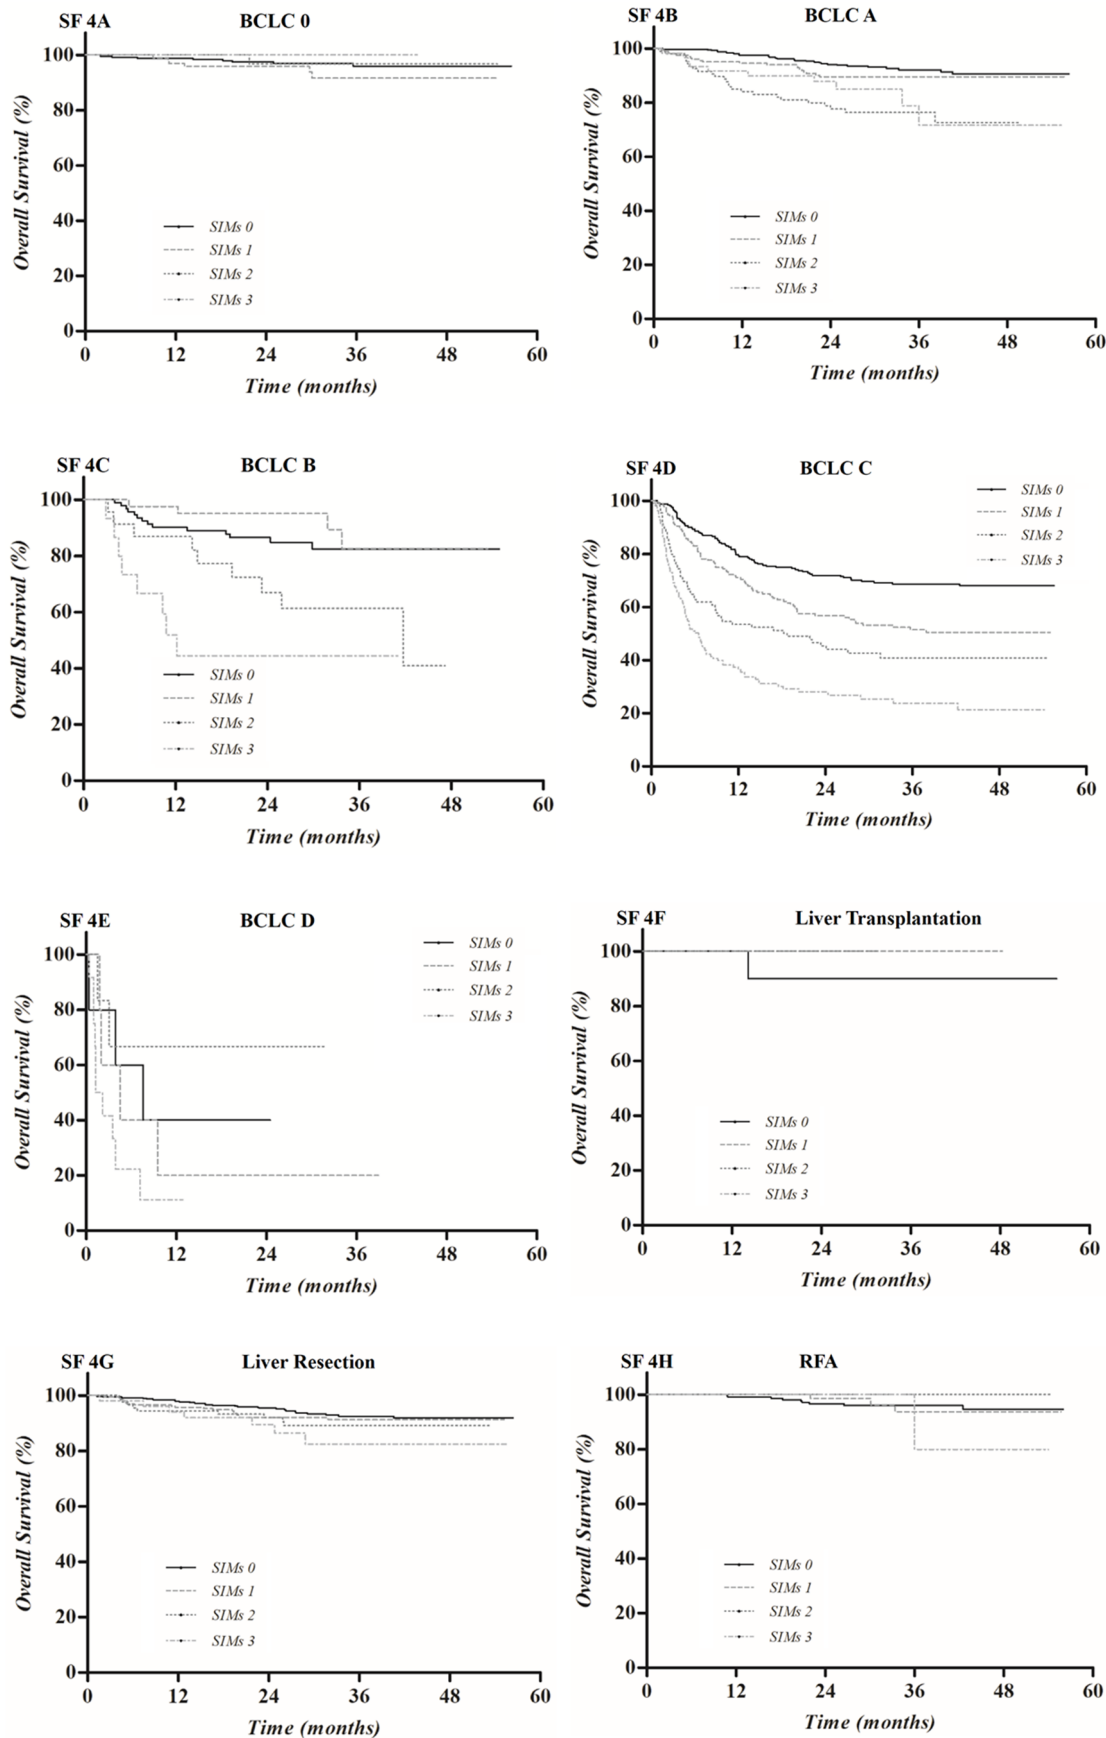

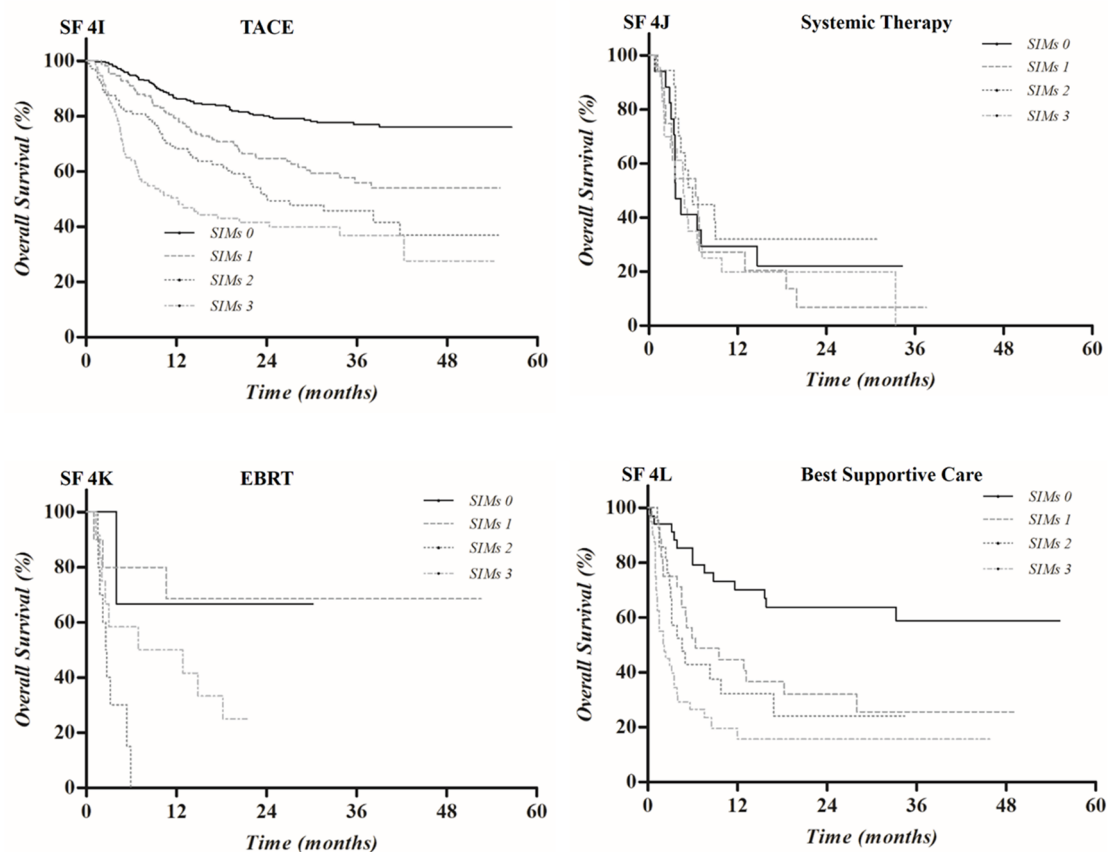

**Figure S4.** Kaplan-Meier curves of OS according to the SIMs and BCLC staging systems or treatment modalities in the validation set.

**Table S2.** Correlation Analysis between Neutrophil to Lymphocyte Ratio (NLR) as the Categorical Variable and Other Variables in the Training Set.

| Variables                 |                         | NLR < 3<br>(n = 5218) | NLR ≥ 3<br>(n = 1361) | p-Value |
|---------------------------|-------------------------|-----------------------|-----------------------|---------|
| Age (years)               | Median                  | 57                    | 56                    | 0.001   |
|                           | Range                   | 13–87                 | 16–88                 |         |
| Sex                       | Male                    | 4142 (79.4)           | 1113 (81.8)           | 0.053   |
|                           | Female                  | 1075 (20.6)           | 248 (18.2)            |         |
| ECOG performance status   | 0                       | 4852 (93.0)           | 1132 (83.2)           | <0.001  |
|                           | 1                       | 302 (5.8)             | 162 (11.9)            |         |
|                           | 2                       | 37 (0.7)              | 25 (1.8)              |         |
|                           | 3                       | 19 (0.4)              | 26 (1.9)              |         |
|                           | 4                       | 8 (0.2)               | 16 (1.2)              |         |
| Cause of hepatitis        | HBV                     | 3878 (74.3)           | 1063 (78.1)           | 0.053   |
|                           | HCV                     | 514 (9.9)             | 124 (9.1)             |         |
|                           | HBV/HCV                 | 47 (0.9)              | 11 (0.8)              |         |
|                           | Alcohol                 | 235 (4.5)             | 50 (3.7)              |         |
|                           | Unknown                 | 544 (10.4)            | 113 (8.3)             |         |
| Child-Pugh Class          | A                       | 4569 (87.6)           | 1000 (73.5)           | <0.001  |
|                           | B                       | 592 (11.3)            | 297 (21.8)            |         |
|                           | C                       | 57 (1.1)              | 64 (4.7)              |         |
| Glasgow prognostic scale* | 0                       | 1181 (41.6)           | 207 (23.4)            | <0.001  |
|                           | 1                       | 1391 (49.0)           | 483 (54.5)            |         |
|                           | 2                       | 268 (9.4)             | 196 (22.1)            |         |
| BCLC stage                | 0                       | 918 (17.6)            | 94 (6.9)              | <0.001  |
|                           | A                       | 2555 (49.0)           | 447 (32.8)            |         |
|                           | B                       | 646 (12.4)            | 112 (8.2)             |         |
|                           | C                       | 1017 (19.5)           | 613 (45.0)            |         |
| ALBI grade                | D                       | 82 (1.6)              | 95 (7.0)              | <0.001  |
|                           | I                       | 2942 (56.4)           | 549 (40.3)            |         |
|                           | II                      | 2078 (39.8)           | 690 (50.7)            |         |
|                           | III                     | 198 (3.8)             | 122 (9.0)             |         |
| Portal vein invasion      | Vp0                     | 4575 (87.7)           | 884 (65.0)            | <0.001  |
|                           | Vp1                     | 274 (5.3)             | 154 (11.3)            |         |
|                           | Vp2                     | 102 (2.0)             | 77 (5.7)              |         |
|                           | Vp3                     | 75 (1.4)              | 48 (3.5)              |         |
|                           | Vp4                     | 192 (3.7)             | 198 (14.5)            |         |
|                           | 1                       | 1072 (20.5)           | 136 (11.3)            |         |
| T stage                   | 2                       | 2420 (46.4)           | 484 (35.6)            | <0.001  |
|                           | 3                       | 1422 (27.3)           | 518 (38.1)            |         |
|                           | 4                       | 304 (5.8)             | 223 (16.4)            |         |
| N stage                   | 0                       | 4991 (95.6)           | 1166 (85.7)           | <0.001  |
|                           | 1                       | 227 (4.4)             | 195 (14.3)            |         |
| M stage                   | 0                       | 5074 (97.2)           | 1200 (88.2)           | <0.001  |
|                           | 1                       | 144 (2.8)             | 161 (11.8)            |         |
| AFP (ng/mL)               | Median                  | 30                    | 185                   | <0.001  |
|                           | Range                   | 1–600000              | 1–600000              |         |
| PIVKA-II (mAU/mL)         | Median                  | 54                    | 500                   | <0.001  |
|                           | Range                   | 2–75000               | 5–75000               |         |
| Primary treatment         | Liver transplantation   | 96 (1.8)              | 32 (2.4)              | <0.001  |
|                           | Hepatectomy             | 1599 (30.6)           | 270 (19.8)            |         |
|                           | Radiofrequency ablation | 1172 (22.5)           | 146 (10.7)            |         |
|                           | TACE                    | 2045 (39.2)           | 570 (41.9)            |         |
|                           | Systemic therapy        | 118 (2.3)             | 134 (9.8)             |         |
|                           | Radiotherapy            | 18 (0.3)              | 14 (1.0)              |         |
|                           | None                    | 170 (3.3)             | 195 (14.3)            |         |
| PLR                       | Median                  | 74.5                  | 133.2                 | <0.001  |
|                           | Range                   | 2.8–793.7             | 24.4–638.8            |         |
| LMR                       | Median                  | 4.5                   | 2.2                   | <0.001  |
|                           | Range                   | 0.7–92.0              | 0.3–30.3              |         |

Abbreviation: NLR = neutrophil to lymphocyte ratio; ECOG = Eastern Cooperative Oncology Group; HBV = hepatitis B virus; HCV = hepatitis C virus; BCLC = Barcelona Clinic Liver Cancer; ALBI = albumin-bilirubin; AFP = alpha-fetoprotein; PIVKA-II = Protein induced by vitamin K absence or

antagonist-II; TACE = trans-arterial chemo-embolization; PLR = platelet to lymphocyte ratio; LMR = lymphocyte to monocyte ratio. Glasgow prognostic scale\*: The C-reactive protein (CRP) test was performed selectively in some patients.

**Table S3.** Correlation Analysis between Platelet to Lymphocyte Ratio (PLR) as the Categorical Variable and Other Variables in the Training Set.

| Variables                 |                         | PLR < 100<br>(n = 4293) | PLR ≥ 100<br>(n = 2285) | p-Value |
|---------------------------|-------------------------|-------------------------|-------------------------|---------|
| Age (years)               | Median                  | 57                      | 56                      | <0.001  |
|                           | Range                   | 27–87                   | 13–88                   |         |
| Sex                       | Male                    | 3438 (80.1)             | 1817 (79.5)             | 0.583   |
|                           | Female                  | 855 (19.9)              | 468 (20.5)              |         |
| ECOG performance status   | 0                       | 4011 (93.4)             | 1973 (86.3)             | <0.001  |
|                           | 1                       | 219 (5.1)               | 245 (10.7)              |         |
|                           | 2                       | 31 (0.7)                | 31 (1.4)                |         |
|                           | 3                       | 18 (0.4)                | 27 (1.2)                |         |
| Cause of hepatitis        | 4                       | 15 (0.3)                | 9 (0.4)                 | 0.115   |
|                           | HBV                     | 3207 (74.7)             | 1734 (75.9)             |         |
|                           | HCV                     | 402 (9.4)               | 236 (10.3)              |         |
|                           | HBV/HCV                 | 43 (1.0)                | 15 (0.7)                |         |
|                           | Alcohol                 | 191 (4.4)               | 94 (4.1)                |         |
| Child-Pugh Class          | Unknown                 | 451 (10.5)              | 206 (9.0)               | 0.863   |
|                           | A                       | 3638 (84.7)             | 1931 (84.5)             |         |
|                           | B                       | 575 (13.4)              | 314 (13.7)              |         |
| Glasgow prognostic scale* | C                       | 81 (1.9)                | 40 (1.8)                | <0.001  |
|                           | 0                       | 928 (41.8)              | 460 (30.5)              |         |
|                           | 1                       | 1064 (47.9)             | 810 (53.8)              |         |
|                           | 2                       | 228 (10.3)              | 236 (15.7)              |         |
| BCLC stage                | 0                       | 813 (18.9)              | 199 (8.7)               | <0.001  |
|                           | A                       | 2088 (48.6)             | 914 (40.0)              |         |
|                           | B                       | 538 (12.5)              | 220 (9.6)               |         |
|                           | C                       | 745 (17.3)              | 885 (38.7)              |         |
| ALBI grade                | D                       | 110 (2.6)               | 67 (2.9)                | 0.028   |
|                           | I                       | 2231 (52.0)             | 1260 (55.1)             |         |
|                           | II                      | 1841 (42.9)             | 927 (40.6)              |         |
| Portal vein invasion      | III                     | 222 (5.2)               | 98 (4.3)                | <0.001  |
|                           | Vp0                     | 3824 (89.1)             | 1635 (71.6)             |         |
|                           | Vp1                     | 186 (4.3)               | 242 (10.6)              |         |
|                           | Vp2                     | 79 (1.8)                | 100 (4.4)               |         |
|                           | Vp3                     | 55 (1.3)                | 68 (3.0)                |         |
| T stage                   | Vp4                     | 150 (3.5)               | 240 (10.5)              | <0.001  |
|                           | 1                       | 980 (22.8)              | 228 (10.0)              |         |
|                           | 2                       | 1941 (45.2)             | 963 (42.1)              |         |
|                           | 3                       | 1132 (26.4)             | 808 (35.4)              |         |
| N stage                   | 4                       | 241 (5.6)               | 286 (12.5)              | <0.001  |
|                           | 0                       | 4111 (95.7)             | 2046 (89.5)             |         |
| M stage                   | 1                       | 183 (4.3)               | 239 (10.5)              | <0.001  |
|                           | 0                       | 4189 (97.6)             | 2085 (91.2)             |         |
| AFP (ng/mL)               | 1                       | 105 (2.4)               | 200 (8.8)               | <0.001  |
|                           | Median                  | 26                      | 128                     |         |
| PIVKA-II (mAU/mL)         | Range                   | 1–200000                | 1–600000                | <0.001  |
|                           | Median                  | 34                      | 336                     |         |
| Primary treatment         | Range                   | 2–75000                 | 3–75000                 | <0.001  |
|                           | Liver transplantation   | 111 (2.6)               | 17 (0.7)                |         |
|                           | Hepatectomy             | 1123 (26.2)             | 746 (32.6)              |         |
|                           | Radiofrequency ablation | 1083 (25.2)             | 235 (10.3)              |         |
|                           | TACE                    | 1731 (40.3)             | 884 (38.7)              |         |
|                           | Systemic therapy        | 87 (2.0)                | 165 (7.2)               |         |
|                           | Radiotherapy            | 16 (0.4)                | 16 (0.7)                |         |
| NLR                       | None                    | 143 (3.3)               | 222 (9.7)               | <0.001  |
|                           | Median                  | 1.5                     | 2.7                     |         |
| LMR                       | Range                   | 0.1–18.7                | 0.2–47.8                | <0.001  |
|                           | Median                  | 4.6                     | 3.0                     |         |
|                           | Range                   | 0.3–92.0                | 0.4–30.3                | <0.001  |



Abbreviation: PLR = platelet to lymphocyte ratio; ECOG = Eastern Cooperative Oncology Group; HBV = hepatitis B virus; HCV = hepatitis C virus; BCLC = Barcelona Clinic Liver Cancer; ALBI = albumin-bilirubin; AFP = alpha-fetoprotein; PIVKA-II = Protein induced by vitamin K absence or antagonist-II; TACE = trans-arterial chemo-embolization; NLR = neutrophil to lymphocyte ratio; LMR = lymphocyte to monocyte ratio. Glasgow prognostic scale\*: The C-reactive protein (CRP) test was performed selectively in some patients.

**Table S4.** Correlation Analysis between Lymphocyte to Monocyte Ratio (LMR) as the Categorical Variable and Other Variables in the Training Set.

| Variables                 |                         | LMR < 3<br>(n = 1775) | LMR ≥ 3<br>(n = 4803) | p-Value |
|---------------------------|-------------------------|-----------------------|-----------------------|---------|
| Age (years)               | Median                  | 57                    | 56                    | 0.306   |
|                           | Range                   | 27–87                 | 13–88                 |         |
| Sex                       | Male                    | 1484 (83.6)           | 3771 (78.5)           | <0.001  |
|                           | Female                  | 291 (16.4)            | 1032 (21.5)           |         |
| ECOG performance status   | 0                       | 1512 (85.2)           | 4472 (93.1)           | <0.001  |
|                           | 1                       | 193 (10.9)            | 271 (5.6)             |         |
|                           | 2                       | 30 (1.7)              | 32 (0.7)              |         |
|                           | 3                       | 25 (1.4)              | 20 (0.4)              |         |
|                           | 4                       | 15 (0.8)              | 9 (0.2)               |         |
| Cause of hepatitis        | HBV                     | 1362 (76.7)           | 3579 (74.5)           | 0.401   |
|                           | HCV                     | 166 (9.4)             | 472 (9.8)             |         |
|                           | HBV/HCV                 | 15 (0.8)              | 43 (0.9)              |         |
|                           | Alcohol                 | 73 (4.1)              | 212 (4.4)             |         |
|                           | Unknown                 | 159 (9.0)             | 498 (10.4)            |         |
| Child-Pugh Class          | A                       | 1258 (70.9)           | 4311 (89.7)           | <0.001  |
|                           | B                       | 434 (24.5)            | 455 (9.5)             |         |
|                           | C                       | 83 (4.7)              | 38 (0.8)              |         |
| Glasgow prognostic scale* | 0                       | 284 (25.0)            | 1104 (42.7)           | <0.001  |
|                           | 1                       | 609 (53.5)            | 1265 (48.9)           |         |
|                           | 2                       | 245 (21.5)            | 219 (8.5)             |         |
| BCLC stage                | 0                       | 132 (7.4)             | 880 (18.3)            | <0.001  |
|                           | A                       | 638 (35.9)            | 2364 (49.2)           |         |
|                           | B                       | 186 (10.5)            | 572 (11.9)            |         |
|                           | C                       | 706 (39.8)            | 924 (19.2)            |         |
| ALBI grade                | D                       | 113 (6.4)             | 64 (1.3)              | <0.001  |
|                           | I                       | 631 (35.5)            | 2860 (59.5)           |         |
|                           | II                      | 966 (54.4)            | 1802 (37.5)           |         |
|                           | III                     | 178 (10.0)            | 142 (3.0)             |         |
| Portal vein invasion      | Vp0                     | 1235 (69.6)           | 4224 (87.9)           | <0.001  |
|                           | Vp1                     | 175 (9.9)             | 253 (5.3)             |         |
|                           | Vp2                     | 82 (4.6)              | 97 (2.0)              |         |
|                           | Vp3                     | 55 (3.1)              | 68 (1.4)              |         |
|                           | Vp4                     | 228 (12.8)            | 162 (3.4)             |         |
| T stage                   | 1                       | 210 (11.8)            | 998 (20.8)            | <0.001  |
|                           | 2                       | 650 (22.4)            | 2254 (46.9)           |         |
|                           | 3                       | 640 (36.1)            | 1300 (27.1)           |         |
|                           | 4                       | 275 (15.5)            | 252 (5.2)             |         |
| N stage                   | 0                       | 1558 (87.8)           | 4599 (95.7)           | <0.001  |
|                           | 1                       | 217 (12.2)            | 205 (4.3)             |         |
| M stage                   | 0                       | 1602 (90.3)           | 4672 (97.3)           | <0.001  |
|                           | 1                       | 173 (9.7)             | 132 (2.7)             |         |
| AFP (ng/mL)               | Median                  | 91                    | 30                    | <0.001  |
|                           | Range                   | 1–600000              | 1–200000              |         |
| PIVKA-II (mAU/mL)         | Median                  | 243                   | 40                    | <0.001  |
|                           | Range                   | 4–75000               | 2–75000               |         |
| Primary treatment         | Liver transplantation   | 60 (3.4)              | 68 (1.4)              | <0.001  |
|                           | Hepatectomy             | 285 (16.1)            | 1584 (33.0)           |         |
|                           | Radiofrequency ablation | 225 (12.7)            | 1093 (22.8)           |         |
|                           | TACE                    | 824 (46.4)            | 1791 (37.3)           |         |
|                           | Systemic therapy        | 139 (7.8)             | 113 (2.4)             |         |
|                           | Radiotherapy            | 15 (0.8)              | 17 (0.3)              |         |
| NLR                       | None                    | 227 (12.8)            | 138 (2.9)             | <0.001  |
|                           | Median                  | 2.7                   | 1.5                   |         |
|                           | Range                   | 0.2–47.8              | 0.1–18.7              |         |
| PLR                       | Median                  | 116.6                 | 74.7                  | <0.001  |
|                           | Range                   | 20.3–638.8            | 2.8–793.7             |         |

Abbreviation: LMR = lymphocyte to monocyte ratio; ECOG = Eastern Cooperative Oncology Group; HBV = hepatitis B virus; HCV = hepatitis C virus; BCLC = Barcelona Clinic Liver Cancer; ALBI = albumin-bilirubin; AFP = alpha-fetoprotein; PIVKA-II = Protein induced by vitamin K absence or

antagonist-II; TACE = trans-arterial chemo-embolization; NLR = neutrophil to lymphocyte ratio; PLR = platelet to lymphocyte ratio. Glasgow prognostic scale<sup>†</sup>: The C-reactive protein (CRP) test was performed selectively in some patients.

**Table S5.** Correlation Analysis between Neutrophil to Lymphocyte Ratio (NLR) as the Categorical Variable and Other Variables in the Validation Set.

| Variables                 |                         | NLR < 3<br>(n = 1681) | NLR ≥ 3<br>(n = 402) | p-Value |
|---------------------------|-------------------------|-----------------------|----------------------|---------|
| Age (years)               | Median                  | 59                    | 58                   | 0.244   |
|                           | Range                   | 22–89                 | 21–86                |         |
| Sex                       | Male                    | 1331 (79.5)           | 343 (85.3)           | 0.005   |
|                           | Female                  | 350 (20.8)            | 248 (14.7)           |         |
| ECOG performance status   | 0                       | 1627 (98.5)           | 376 (95.4)           | <0.001  |
|                           | 1                       | 24 (1.5)              | 17 (4.1.5)           |         |
|                           | 2                       | 0 (0.0)               | 1 (0.3)              |         |
|                           | 3                       | 0 (0.0)               | 0 (0.0)              |         |
|                           | 4                       | 1 (0.1)               | 0 (0.0)              |         |
| Cause of hepatitis        | HBV                     | 1257 (74.8)           | 296 (73.6)           | 0.01    |
|                           | HCV                     | 159 (9.5)             | 23 (5.7)             |         |
|                           | HBV/HCV                 | 13 (0.8)              | 6 (1.5)              |         |
|                           | Alcohol                 | 108 (6.4)             | 26 (6.5)             |         |
|                           | Unknown                 | 144 (8.6)             | 51 (12.6)            |         |
| Child-Pugh Class          | A                       | 1550 (92.2)           | 305 (75.9)           | <0.001  |
|                           | B                       | 120 (7.1)             | 79 (19.7)            |         |
|                           | C                       | 11 (0.7)              | 18 (4.5)             |         |
| Hepatic steatosis index   | <30                     | 179 (10.9)            | 56 (14.4)            | 0.04    |
|                           | 30–36                   | 785 (47.6)            | 161 (41.4)           |         |
|                           | >36                     | 684 (41.5)            | 172 (44.2)           |         |
| Glasgow prognostic scale* | 0                       | 125 (71.0)            | 31 (31.0)            | <0.001  |
|                           | 1                       | 44 (25.0)             | 36 (36.0)            |         |
|                           | 2                       | 7 (4.0)               | 33 (33.0)            |         |
| BCLC stage                | 0                       | 362 (21.5)            | 36 (9.0)             | <0.001  |
|                           | A                       | 666 (39.6)            | 123 (30.6)           |         |
|                           | B                       | 147 (8.7)             | 28 (7.0)             |         |
|                           | C                       | 496 (29.5)            | 197 (49.0)           |         |
|                           | D                       | 10 (0.6)              | 18 (4.5)             |         |
| ALBI grade                | I                       | 1285 (85.5)           | 218 (54.2)           | <0.001  |
|                           | II                      | 370 (22.0)            | 166 (41.3)           |         |
|                           | III                     | 26 (1.5)              | 18 (4.5)             |         |
| Portal vein invasion      | Vp0                     | 1244 (74.0)           | 232 (57.9)           | <0.001  |
|                           | Vp1                     | 291 (17.3)            | 45 (11.2)            |         |
|                           | Vp2                     | 1 (0.1)               | 0 (0.0)              |         |
|                           | Vp3                     | 80 (4.8)              | 56 (14.0)            |         |
|                           | Vp4                     | 65 (3.9)              | 68 (17.0)            |         |
| T stage                   | 1                       | 328 (19.5)            | 41 (10.2)            | <0.001  |
|                           | 2                       | 721 (42.9)            | 137 (34.2)           |         |
|                           | 3                       | 482 (28.7)            | 138 (34.4)           |         |
|                           | 4                       | 150 (8.9)             | 85 (21.2)            |         |
| N stage                   | 0                       | 1602 (95.3)           | 349 (87.0)           | <0.001  |
|                           | 1                       | 79 (4.7)              | 52 (13.0)            |         |
| M stage                   | 0                       | 1655 (98.5)           | 370 (92.3)           | <0.001  |
|                           | 1                       | 26 (1.5)              | 31 (7.7)             |         |
| AFP (ng/mL)               | Median                  | 18                    | 60                   | <0.001  |
|                           | Range                   | 1–200000              | 1–200000             |         |
| PIVKA-II (mAU/mL)         | Median                  | 53                    | 820                  | <0.001  |
|                           | Range                   | 6–75000               | 10–75000             |         |
| Primary treatment         | Liver transplantation   | 17 (1.0)              | 4 (1.0)              | <0.001  |
|                           | Hepatectomy             | 676 (40.2)            | 105 (26.1)           |         |
|                           | Radiofrequency ablation | 315 (18.7)            | 35 (8.7)             |         |
|                           | TACE                    | 544 (32.4)            | 149 (37.1)           |         |
|                           | Systemic therapy        | 4 (2.5)               | 34 (8.5)             |         |
|                           | Radiotherapy            | 18 (1.1)              | 19 (4.7)             |         |
|                           | None                    | 69 (4.1)              | 56 (13.9)            |         |
| PLR                       | Median                  | 80.9                  | 139.7                | <0.001  |
|                           | Range                   | 13.0–355.4            | 34.4–1491.7          |         |
| LMR                       | Median                  | 4.3                   | 2.2                  | <0.001  |
|                           | Range                   | 0.8–40.0              | 0.2–22.0             |         |

Abbreviation: NLR = neutrophil to lymphocyte ratio; ECOG = Eastern Cooperative Oncology Group; HBV = hepatitis B virus; HCV = hepatitis C virus; BCLC = Barcelona Clinic Liver Cancer; ALBI = albumin-bilirubin; AFP = alpha-fetoprotein; PIVKA-II = Protein induced by vitamin K absence or antagonist-II; TACE = trans-arterial chemo-embolization; PLR = platelet to lymphocyte ratio; LMR = lymphocyte to monocyte ratio. Glasgow prognostic scale\*: The C-reactive protein (CRP) test was performed selectively in some patients.

**Table S6.** Correlation Analysis between Platelet to Lymphocyte Ratio (PLR) as the Categorical Variable and Other Variables in the Validation Set.

| Variables                 |                         | PLR < 100<br>(n = 1257) | PLR ≥ 100<br>(n = 826) | p-Value |
|---------------------------|-------------------------|-------------------------|------------------------|---------|
| Age (years)               | Median                  | 59                      | 59                     | 0.169   |
|                           | Range                   | 22–89                   | 21–88                  |         |
| Sex                       | Male                    | 993 (79.0)              | 681 (82.4)             | 0.055   |
|                           | Female                  | 264 (21.0)              | 145 (17.6)             |         |
| ECOG performance status   | 0                       | 1213 (98.3)             | 790 (97.3)             | 0.139   |
|                           | 1                       | 20 (1.6)                | 21 (2.6)               |         |
|                           | 2                       | 0 (0.0)                 | 1 (0.1)                |         |
|                           | 3                       | 0 (0.0)                 | 0 (0.0)                |         |
|                           | 4                       | 1 (0.1)                 | 0 (0.0)                |         |
| Cause of hepatitis        | HBV                     | 923 (73.4)              | 630 (76.3)             | <0.001  |
|                           | HCV                     | 138 (11.0)              | 44 (5.3)               |         |
|                           | HBV/HCV                 | 12 (1.0)                | 7 (0.8)                |         |
|                           | Alcohol                 | 89 (7.1)                | 45 (5.4)               |         |
|                           | Unknown                 | 95 (7.6)                | 100 (12.1)             |         |
| Child-Pugh Class          | A                       | 1121 (89.2)             | 734 (88.9)             | 0.615   |
|                           | B                       | 121 (9.6)               | 78 (9.4)               |         |
|                           | C                       | 15 (1.2)                | 14 (1.7)               |         |
| Hepatic steatosis index   | <30                     | 133 (10.8)              | 102 (12.7)             | 0.17    |
|                           | 30–36                   | 562 (45.7)              | 384 (47.6)             |         |
|                           | >36                     | 536 (43.5)              | 320 (39.7)             |         |
| Glasgow prognostic scale* | 0                       | 90 (62.9)               | 66 (49.6)              | 0.007   |
|                           | 1                       | 41 (28.7)               | 39 (29.3)              |         |
|                           | 2                       | 12 (8.4)                | 28 (21.1)              |         |
| BCLC stage                | 0                       | 292 (23.2)              | 106 (12.8)             | <0.001  |
|                           | A                       | 494 (39.3)              | 295 (35.7)             |         |
|                           | B                       | 119 (9.5)               | 56 (2.7)               |         |
|                           | C                       | 338 (26.9)              | 355 (43.0)             |         |
| ALBI grade                | D                       | 14 (1.1)                | 14 (1.7)               | 0.259   |
|                           | I                       | 892 (42.8)              | 611 (40.7)             |         |
|                           | II                      | 335 (26.7)              | 201 (24.3)             |         |
|                           | III                     | 30 (2.4)                | 14 (1.7)               |         |
| Portal vein invasion      | Vp0                     | 955 (76.0)              | 521 (63.2)             | <0.001  |
|                           | Vp1                     | 212 (16.9)              | 124 (15.0)             |         |
|                           | Vp2                     | 0 (0.0)                 | 1 (0.1)                |         |
|                           | Vp3                     | 52 (4.1)                | 84 (10.2)              |         |
| T stage                   | Vp4                     | 38 (3.0)                | 95 (11.5)              | <0.001  |
|                           | 1                       | 277 (22.0)              | 92 (11.2)              |         |
|                           | 2                       | 525 (41.8)              | 333 (40.4)             |         |
|                           | 3                       | 351 (27.9)              | 269 (32.6)             |         |
| N stage                   | 4                       | 104 (8.3)               | 131 (15.9)             | <0.001  |
|                           | 0                       | 529 (88.2)              | 1423 (96.0)            |         |
|                           | 1                       | 71 (11.8)               | 60 (4.0)               |         |
| M stage                   | 0                       | 564 (94.0)              | 1462 (98.6)            | <0.001  |
|                           | 1                       | 36 (6.0)                | 21 (1.4)               |         |
| AFP (ng/mL)               | Median                  | 15                      | 47                     | <0.001  |
|                           | Range                   | 1–200000                | 1–200000               |         |
| PIVKA-II (mAU/mL)         | Median                  | 43                      | 409                    | <0.001  |
|                           | Range                   | 6–75000                 | 10–75000               |         |
| Primary treatment         | Liver transplantation   | 20 (1.5)                | 1 (0.1)                | <0.001  |
|                           | Hepatectomy             | 449 (35.7)              | 332 (40.2)             |         |
|                           | Radiofrequency ablation | 266 (21.2)              | 84 (10.2)              |         |
|                           | TACE                    | 425 (33.8)              | 268 (32.4)             |         |
|                           | Systemic therapy        | 27 (2.1)                | 49 (5.9)               |         |
|                           | Radiotherapy            | 13 (1.0)                | 24 (2.9)               |         |
|                           | None                    | 57 (4.5)                | 68 (8.2)               |         |
| PLR                       | Median                  | 1.6                     | 2.6                    | <0.001  |
|                           | Range                   | 0.3–15.3                | 0.5–46.9               |         |
| LMR                       | Median                  | 4.5                     | 3.1                    | <0.001  |
|                           | Range                   | 0.7–40.0                | 0.2–22.0               |         |

Abbreviation: PLR = platelet to lymphocyte ratio; ECOG = Eastern Cooperative Oncology Group; HBV = hepatitis B virus; HCV = hepatitis C virus; BCLC = Barcelona Clinic Liver Cancer; ALBI = albumin-bilirubin; AFP = alpha-fetoprotein; PIVKA-II = Protein induced by vitamin K absence or antagonist-II; TACE = trans-arterial chemo-embolization; NLR = neutrophil to lymphocyte ratio; LMR = lymphocyte to monocyte ratio. Glasgow prognostic scale\*: The C-reactive protein (CRP) test was performed selectively in some patients.

**Table S7.** Correlation Analysis between Lymphocyte to Monocyte Ratio (LMR) as the categorical variable and other variables in the validation set.

| Variables                 |                         | LMR < 3<br>(n = 599) | LMR ≥ 3<br>(n = 1482) | p-Value |
|---------------------------|-------------------------|----------------------|-----------------------|---------|
| Age (years)               | Median                  | 59                   | 59                    | 0.306   |
|                           | Range                   | 22–89                | 21–88                 |         |
| Sex                       | Male                    | 525 (87.5)           | 1149 (77.5)           | <0.001  |
|                           | Female                  | 75 (12.5)            | 334 (22.5)            |         |
| ECOG performance status   | 0                       | 567 (96.4)           | 1436 (98.5)           | 0.004   |
|                           | 1                       | 20 (3.4)             | 21 (1.4)              |         |
|                           | 2                       | 1 (0.2)              | 0 (0.0)               |         |
|                           | 3                       | 0 (0.0)              | 0 (0.0)               |         |
|                           | 4                       | 0 (0.0)              | 1 (0.1)               |         |
| Cause of hepatitis        | HBV                     | 418 (69.7)           | 1135 (76.5)           | <0.001  |
|                           | HCV                     | 44 (7.3)             | 138 (9.3)             |         |
|                           | HBV/HCV                 | 5 (0.8)              | 14 (0.9)              |         |
|                           | Alcohol                 | 61 (10.2)            | 73 (3.5)              |         |
|                           | Unknown                 | 72 (12.0)            | 123 (8.3)             |         |
| Child-Pugh Class          | A                       | 465 (77.5)           | 1390 (93.7)           | <0.001  |
|                           | B                       | 114 (19.0)           | 85 (5.7)              |         |
|                           | C                       | 21 (3.5)             | 8 (0.5)               |         |
| Hepatic steatosis index   | <30                     | 61 (10.5)            | 174 (12.0)            | <0.001  |
|                           | 30–36                   | 235 (40.4)           | 711 (48.9)            |         |
|                           | >36                     | 286 (49.1)           | 570 (39.2)            |         |
| Glasgow prognostic scale* | 0                       | 108 (77.7)           | 48 (35.0)             | <0.001  |
|                           | 1                       | 25 (18.0)            | 55 (40.1)             |         |
|                           | 2                       | 6 (4.3)              | 34 (24.8)             |         |
| BCLC stage                | 0                       | 73 (12.2)            | 325 (21.9)            | <0.001  |
|                           | A                       | 186 (31.0)           | 603 (40.7)            |         |
|                           | B                       | 50 (8.3)             | 125 (8.4)             |         |
|                           | C                       | 270 (45.0)           | 423 (28.5)            |         |
| ALBI grade                | D                       | 21 (3.5)             | 7 (0.5)               | <0.001  |
|                           | I                       | 303 (50.5)           | 1200 (80.9)           |         |
|                           | II                      | 269 (44.8)           | 267 (18.0)            |         |
|                           | III                     | 28 (4.7)             | 16 (1.1)              |         |
| Portal vein invasion      | Vp0                     | 367 (61.3)           | 1109 (74.8)           | <0.001  |
|                           | Vp1                     | 79 (13.2)            | 257 (17.3)            |         |
|                           | Vp2                     | 0 (0.0)              | 1 (0.1)               |         |
|                           | Vp3                     | 71 (11.9)            | 65 (4.4)              |         |
|                           | Vp4                     | 82 (13.7)            | 51 (3.4)              |         |
| T stage                   | 1                       | 79 (13.2)            | 290 (19.6)            | <0.001  |
|                           | 2                       | 197 (32.9)           | 661 (44.6)            |         |
|                           | 3                       | 206 (34.4)           | 414 (27.9)            |         |
|                           | 4                       | 117 (19.5)           | 118 (8.0)             |         |
| N stage                   | 0                       | 1558 (87.8)          | 4599 (95.7)           | <0.001  |
|                           | 1                       | 217 (12.2)           | 205 (4.3)             |         |
| M stage                   | 0                       | 1602 (90.3)          | 4672 (97.3)           | <0.001  |
|                           | 1                       | 173 (9.7)            | 132 (2.7)             |         |
| AFP (ng/mL)               | Median                  | 19                   | 34                    | <0.001  |
|                           | Range                   | 1–200000             | 1–200000              |         |
| PIVKA-II (mAU/mL)         | Median                  | 53                   | 301                   | <0.001  |
|                           | Range                   | 6–75000              | 8–75000               |         |
| Primary treatment         | Liver transplantation   | 11 (1.8)             | 10 (0.7)              | <0.001  |
|                           | Hepatectomy             | 135 (22.5)           | 646 (43.6)            |         |
|                           | Radiofrequency ablation | 74 (12.3)            | 276 (18.6)            |         |
|                           | TACE                    | 238 (39.7)           | 455 (30.7)            |         |
|                           | Systemic therapy        | 45 (7.5)             | 31 (2.1)              |         |
|                           | Radiotherapy            | 29 (4.8)             | 8 (0.5)               |         |
|                           | None                    | 68 (3.3)             | 57 (3.8)              |         |
| PLR                       | Median                  | 1.6                  | 3.1                   | <0.001  |
|                           | Range                   | 0.3–7.2              | 0.4–46.9              |         |
| LMR                       | Median                  | 80.0                 | 121.1                 | <0.001  |
|                           | Range                   | 13.0–451.1           | 25.5–1491.7           |         |



Abbreviation: LMR = lymphocyte to monocyte ratio; ECOG = Eastern Cooperative Oncology Group; HBV = hepatitis B virus; HCV = hepatitis C virus; BCLC = Barcelona Clinic Liver Cancer; ALBI = albumin-bilirubin; AFP = alpha-fetoprotein; PIVKA-II = Protein induced by vitamin K absence or antagonist-II; TACE = trans-arterial chemo-embolization; NLR = neutrophil to lymphocyte ratio; PLR = platelet to lymphocyte ratio. Glasgow prognostic scale\*: The C-reactive protein (CRP) test was performed selectively in some patients.

**Table S8.** Reference ranges of blood cell categories associated with systemic inflammation markers.

| Blood cell categories             | Reference Ranges                                                                         |
|-----------------------------------|------------------------------------------------------------------------------------------|
| Lymphocytes (absolute count)      | 1,500–4,000/ $\mu$ L                                                                     |
| Neutrophil (absolute count)       | 1,570–8,300/ $\mu$ L                                                                     |
| Platelet (absolute count)         | 141,000–316,000/ $\mu$ L (male)<br>138,000–347,000/ $\mu$ L (female)                     |
| Monocyte (%)                      | 2.2–8.2% of white blood cell count (male)<br>1.7–8.0% of white blood cell count (female) |
| White blood cell (absolute count) | 3,800–10,580/ $\mu$ L (male)<br>3,150–8,630/ $\mu$ L (female)                            |

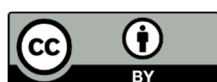

© 2020 by the authors. Submitted for possible open access publication under the terms and conditions of the Creative Commons Attribution (CC BY) license (<http://creativecommons.org/licenses/by/4.0/>).
